# Supplementary material
Source: publisher site journal article supplement (https://www.spandidos-publications.com/371/downloadSupplementary)

Figure S1. YAP expression level in ESCC cell lines. The expression levels of YAP were detected in five common ESCC cell lines (TE-10, TE-11, Kyse150, Kyse140 and Eca109). Results showed that Kyse150 and Eca109 expressed higher level of YAP than other three cell lines.

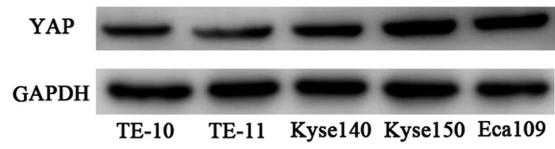

Supplement: Supplementary file 1 [file downloadSupplementary]
